# Supplementary material
Source: MDPI journal article supplement (https://www.mdpi.com/2073-4433/13/10/1709)

**Table S1.** Logistic regression statistics for spatial distribution of three vegetation zones (sub-Mediterranean, eu-Mediterranean and steno-Mediterranean). Predictor variables were altitude (A), precipitation (P) and temperature (T).

| Model for sub-Mediterranean<br>(3 variables, n=38)   |          |             | R-squared<br>(McFadden) | RMSE        | Mean    | # Fitted  | ROC area  | Critical z | Conf. level |
|------------------------------------------------------|----------|-------------|-------------------------|-------------|---------|-----------|-----------|------------|-------------|
| Logistic Regression Statistics:                      |          |             | 1,000                   | 0,000       | 0,368   | 38        | 1,00      | 1,960      | 95,0%       |
| Logistic Regression<br>Coefficient Estimates:        | Variable | Coefficient | Std.Err.                | z-statistic | P-value | Lower 95% | Upper 95% | VIF        | Std. coeff. |
|                                                      | Constant | -66,573     | 318,197                 | -0,209      | 0,834   | -690,228  | 557,083   |            |             |
|                                                      | A        | 0,532       | 0,933                   | 0,570       | 0,568   | -1,297    | 2,361     | 1,488      | 32,397      |
|                                                      | P        | 0,168       | 0,279                   | 0,601       | 0,548   | -0,380    | 0,715     | 1,149      | 23,632      |
|                                                      | T        | -9,163      | 21,845                  | -0,419      | 0,675   | -51,979   | 33,653    | 1,605      | -6,517      |
| Model for eu-Mediterranean<br>(3 variables, n=38)    |          |             | R-squared<br>(McFadden) | RMSE        | Mean    | # Fitted  | ROC area  | Critical z | Conf. level |
| Logistic Regression Statistics:                      |          |             | 0,150                   | 0,455       | 0,447   | 38        | 0,70      | 1,960      | 95,0%       |
| Logistic Regression<br>Coefficient Estimates:        | Variable | Coefficient | Std.Err.                | z-statistic | P-value | Lower 95% | Upper 95% | VIF        | Std. coeff. |
|                                                      | Constant | 4,258       | 6,346                   | 0,671       | 0,502   | -8,181    | 16,697    |            |             |
|                                                      | A        | -0,012      | 0,006877                | -1,703      | 0,088   | -0,025    | 0,001764  | 1,488      | -0,713      |
|                                                      | P        | -0,002265   | 0,001717                | -1,320      | 0,187   | -0,005630 | 0,001099  | 1,149      | -0,319      |
|                                                      | T        | -0,106      | 0,364                   | -0,290      | 0,772   | -0,819    | 0,608     | 1,605      | -0,075      |
| Model for steno-Mediterranean<br>(3 variables, n=38) |          |             | R-squared<br>(McFadden) | RMSE        | Mean    | # Fitted  | ROC area  | Critical z | Conf. level |
| Logistic Regression Statistics:                      |          |             | 0,797                   | 0,184       | 0,184   | 38        | 0,99      | 1,960      | 95,0%       |
| Logistic Regression<br>Coefficient Estimates:        | Variable | Coefficient | Std.Err.                | z-statistic | P-value | Lower 95% | Upper 95% | VIF        | Std. coeff. |
|                                                      | Constant | -64,780     | 51,345                  | -1,262      | 0,207   | -165,415  | 35,856    |            |             |
|                                                      | A        | -0,047      | 0,033                   | -1,420      | 0,156   | -0,111    | 0,018     | 1,488      | -2,844      |
|                                                      | P        | -0,036      | 0,022                   | -1,674      | 0,094   | -0,079    | 0,006226  | 1,149      | -5,127      |
|                                                      | T        | 6,062       | 4,196                   | 1,444       | 0,149   | -2,163    | 14,287    | 1,605      | 4,311       |

**Table S2.** Correlations among studied bioclimatic variables at 38 sites from the east Adriatic coast. Lower diagonal matrix: correlation coefficients ( $r$ ). Upper diagonal matrix: corresponding  $P$ -values.

|           | P     | T     | m     | M     | PET   | LDS   | DSWD  | LRF   | P/PET | DMI   | CONTINETY | Io    | Iosq  | It    | Q2    | EQ  |
|-----------|-------|-------|-------|-------|-------|-------|-------|-------|-------|-------|-----------|-------|-------|-------|-------|-----|
| P         |       | *     | **    | *     | *     | ***   | ***   | **    | ***   | **    | *         | ***   | ***   | ns    | ***   | *** |
| T         | -0.36 |       | ***   | ns    | ***   | ***   | ***   | ***   | ***   | **    | ***       | ***   | ***   | *     | **    | **  |
| m         | -0.51 | 0.57  |       | ***   | **    | ***   | ***   | ***   | ***   | ***   | ***       | ***   | ***   | ns    | *     | **  |
| M         | 0.39  | -0.01 | -0.82 |       | ns    | ns    | ns    | *     | *     | *     | **        | *     | ns    | ns    | ns    | ns  |
| PET       | -0.32 | 0.99  | 0.49  | 0.07  |       | ***   | ***   | ***   | **    | **    | **        | ***   | ***   | *     | *     | **  |
| LDS       | -0.72 | 0.70  | 0.57  | -0.22 | 0.66  |       | ***   | ***   | ***   | ***   | **        | ***   | ***   | ns    | ***   | *** |
| DSWD      | 0.73  | -0.82 | -0.57 | 0.14  | -0.80 | -0.93 |       | ***   | ***   | ***   | **        | ***   | ***   | *     | ***   | *** |
| LRF       | 0.96  | -0.60 | -0.60 | 0.33  | -0.57 | -0.80 | 0.85  |       | ***   | ***   | **        | ***   | ***   | ns    | ***   | *** |
| P/PET     | 0.92  | -0.56 | -0.65 | 0.41  | -0.52 | -0.67 | 0.73  | 0.96  |       | ***   | ***       | ***   | ***   | ns    | ***   | *** |
| DMI       | 0.98  | -0.51 | -0.57 | 0.36  | -0.48 | -0.78 | 0.81  | 0.99  | 0.95  |       | **        | ***   | ***   | ns    | ***   | *** |
| CONTINETY | 0.37  | -0.62 | -0.73 | 0.42  | -0.53 | -0.51 | 0.52  | 0.48  | 0.57  | 0.45  |           | **    | **    | ns    | ns    | **  |
| Io        | 0.96  | -0.60 | -0.60 | 0.33  | -0.57 | -0.80 | 0.85  | 1.00  | 0.96  | 0.99  | 0.48      |       | ***   | ns    | ***   | *** |
| Iosq      | 0.71  | -0.77 | -0.56 | 0.17  | -0.74 | -0.91 | 0.97  | 0.83  | 0.68  | 0.79  | 0.45      | 0.83  |       | ns    | ***   | *** |
| It        | -0.13 | 0.38  | 0.11  | 0.16  | 0.37  | 0.29  | -0.35 | -0.23 | -0.20 | -0.19 | -0.23     | -0.23 | -0.32 |       | ns    | ns  |
| Q2        | 0.78  | -0.42 | -0.38 | 0.17  | -0.40 | -0.65 | 0.67  | 0.80  | 0.73  | 0.80  | 0.17      | 0.80  | 0.70  | -0.20 |       | *** |
| EQ        | -0.94 | 0.50  | 0.54  | -0.30 | 0.47  | 0.82  | -0.83 | -0.94 | -0.88 | -0.95 | -0.45     | -0.94 | -0.77 | 0.25  | -0.78 |     |

$P$ -value significance level: ns  $P > 0.05$ , \*  $0.01 < P < 0.05$ , \*\*  $0.001 < P < 0.01$ , \*\*\*  $P < 0.001$ .

**Table S3.** Correlations between 16 bioclimatic variables and the first three principal components.

| Bioclimatic variable     | PC-Principal component |        |        |
|--------------------------|------------------------|--------|--------|
|                          | PC1                    | PC2    | PC3    |
| T                        | -0.765                 | -0.323 | -0.322 |
| m                        | -0.846                 | 0.470  | -0.144 |
| M                        | 0.499                  | -0.803 | -0.079 |
| LDS                      | -0.861                 | -0.252 | 0.126  |
| DMI                      | 0.850                  | 0.117  | -0.393 |
| CONTINETY                | 0.736                  | -0.226 | 0.487  |
| It                       | -0.327                 | -0.581 | -0.454 |
| Q2                       | 0.687                  | 0.307  | -0.572 |
| Eigenvalue               | 4.14                   | 1.53   | 1.07   |
| % of total variance      | 51.71                  | 19.12  | 13.40  |
| Cumulative % of variance | 51.71                  | 70.82  | 84.22  |

**Figure S1.** Biplot of the principal component analysis based on bioclimatic variables PC1-PC3.

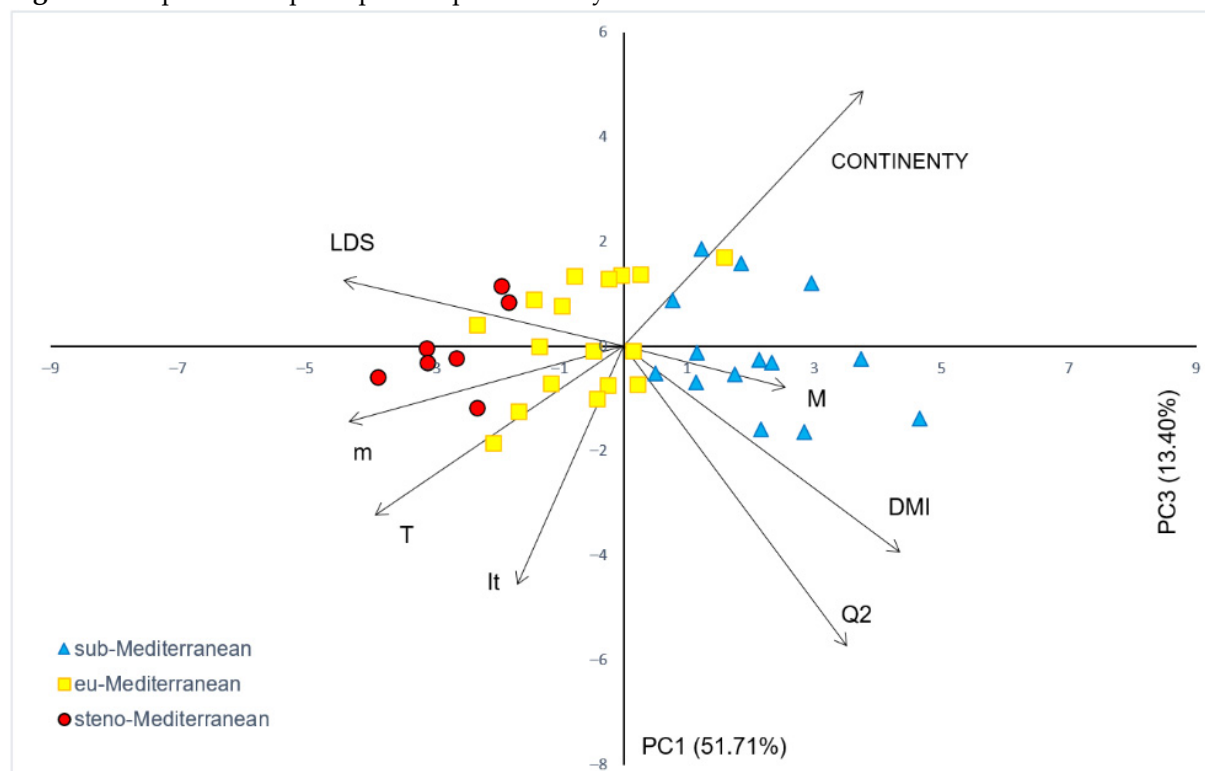

Supplement: s1 [file s1]
